# Supplementary material for: A series of lanthanide-transition metal coordination polymers with mixed ligands: syntheses, structures, photoluminescence and magnetic properties
Source: Royal Society of Chemistry journal article supplement (doi:10.1039/c0ce00724b), 2011-01-01
Supplement: c0ce00724b.pdf [file c0ce00724b.pdf]

## Electronic supplementary information

### A series of lanthanide-transition metal coordination polymers with mixed ligands: syntheses, structures, photoluminescence and magnetic properties

Ji-Cheng Ma, Ying-Ying Liu, Jin Yang\*, Yun-Yu Liu, Jian-Fang Ma\*

*Key Lab of Polyoxometalate Science, Department of Chemistry, Northeast Normal University, Changchun 130024, People's Republic of China*

Table S1. Selected bonds lengths (Å) and angles (°) for compounds **1-6**

| Compound 1 <sup>a</sup>  |          |                                              |            |                                              |            |
|--------------------------|----------|----------------------------------------------|------------|----------------------------------------------|------------|
| Co(1)-O(3)               | 1.949(4) | N(3)-Co(1)-N(4)                              | 76.46(17)  | O(9)-Y(1)-O(5)                               | 122.45(10) |
| Co(1)-N(1)               | 2.050(4) | N(2)-Co(1)-N(4)                              | 76.17(18)  | O(2)-Y(2)-O(8) <sup>#2</sup>                 | 76.43(13)  |
| Co(1)-N(3)               | 2.053(4) | O(16) <sup>#1</sup> -Y(1)-O(1)               | 101.79(14) | O(2)-Y(2)-O(15) <sup>#2</sup>                | 146.28(12) |
| Co(1)-N(2)               | 2.072(5) | O(16) <sup>#1</sup> -Y(1)-O(7) <sup>#2</sup> | 76.90(13)  | O(8) <sup>#2</sup> -Y(2)-O(15) <sup>#2</sup> | 74.70(12)  |
| Co(1)-N(4)               | 2.238(4) | O(1)-Y(1)-O(7) <sup>#2</sup>                 | 81.48(13)  | O(2)-Y(2)-O(5)                               | 85.92(11)  |
| Y(1)-O(16) <sup>#1</sup> | 2.227(3) | O(16) <sup>#1</sup> -Y(1)-O(10)              | 81.25(13)  | O(8) <sup>#2</sup> -Y(2)-O(5)                | 87.31(11)  |
| Y(1)-O(1)                | 2.236(3) | O(1)-Y(1)-O(10)                              | 73.98(12)  | O(15) <sup>#2</sup> -Y(2)-O(5)               | 75.72(11)  |
| Y(1)-O(7) <sup>#2</sup>  | 2.294(3) | O(7) <sup>#2</sup> -Y(1)-O(10)               | 142.83(13) | O(2)-Y(2)-O(13)                              | 130.77(12) |
| Y(1)-O(10)               | 2.324(3) | O(16) <sup>#1</sup> -Y(1)-O(6)               | 148.06(13) | O(8) <sup>#2</sup> -Y(2)-O(13)               | 151.62(12) |
| Y(1)-O(6)                | 2.378(3) | O(1)-Y(1)-O(6)                               | 101.79(14) | O(15) <sup>#2</sup> -Y(2)-O(13)              | 81.10(11)  |
| Y(1)-OW1                 | 2.391(3) | O(7) <sup>#2</sup> -Y(1)-O(6)                | 127.89(12) | O(5)-Y(2)-O(13)                              | 101.01(11) |
| Y(1)-O(9)                | 2.484(3) | O(10)-Y(1)-O(6)                              | 84.88(12)  | O(2)-Y(2)-O(11) <sup>#3</sup>                | 106.93(14) |
| Y(1)-O(5)                | 2.549(3) | O(16) <sup>#1</sup> -Y(1)-OW1                | 84.18(13)  | O(8) <sup>#2</sup> -Y(2)-O(11) <sup>#3</sup> | 79.11(13)  |

|                               |            |                                              |            |                                               |            |
|-------------------------------|------------|----------------------------------------------|------------|-----------------------------------------------|------------|
| Y(2)-O(2)                     | 2.286(3)   | O(1)-Y(1)-OW1                                | 158.80(12) | O(15)#2-Y(2)-O(11) <sup>#3</sup>              | 84.33(13)  |
| Y(2)-O(8) <sup>#2</sup>       | 2.300(3)   | O(7) <sup>#2</sup> -Y(1)-OW1                 | 80.12(12)  | O(5)-Y(2)-O(11) <sup>#3</sup>                 | 158.28(12) |
| Y(2)-O(15) <sup>#2</sup>      | 2.318(3)   | O(10)-Y(1)-OW1                               | 127.21(12) | O(13)-Y(2)-O(11) <sup>#3</sup>                | 84.01(13)  |
| Y(2)-O(5)                     | 2.369(3)   | O(6)-Y(1)-OW1                                | 81.56(13)  | O(2)-Y(2)-O(12) <sup>#3</sup>                 | 74.41(12)  |
| Y(2)-O(13)                    | 2.378(3)   | O(16) <sup>#1</sup> -Y(1)-O(9)               | 76.57(12)  | O(8) <sup>#2</sup> -Y(2)-O(12) <sup>#3</sup>  | 111.41(12) |
| Y(2)-O(11) <sup>#3</sup>      | 2.390(3)   | O(1)-Y(1)-O(9)                               | 127.96(12) | O(15) <sup>#2</sup> -Y(2)-O(12) <sup>#3</sup> | 132.96(12) |
| Y(2)-O(12) <sup>#3</sup>      | 2.424(3)   | O(7) <sup>#2</sup> -Y(1)-O(9)                | 143.81(12) | O(5)-Y(2)-O(12) <sup>#3</sup>                 | 148.07(11) |
| Y(2)-O(14)                    | 2.443(3)   | O(10)-Y(1)-O(9)                              | 54.18(11)  | O(13)-Y(2)-O(12) <sup>#3</sup>                | 75.06(12)  |
| O(3)-Co(1)-N(1)               | 108.61(17) | O(6)-Y(1)-O(9)                               | 71.98(11)  | O(11) <sup>#3</sup> -Y(2)-O(12) <sup>#3</sup> | 53.65(12)  |
| O(3)-Co(1)-N(3)               | 109.02(17) | OW1-Y(1)-O(9)                                | 73.12(11)  | O(2)-Y(2)-O(14)                               | 81.25(12)  |
| N(1)-Co(1)-N(3)               | 116.39(18) | O(16) <sup>#1</sup> -Y(1)-O(5)               | 153.18(12) | O(8) <sup>#2</sup> -Y(2)-O(14)                | 153.98(12) |
| O(3)-Co(1)-N(2)               | 91.60(18)  | O(1)-Y(1)-O(5)                               | 81.64(12)  | O(15) <sup>#2</sup> -Y(2)-O(14)               | 120.87(11) |
| N(1)-Co(1)-N(2)               | 108.58(17) | O(7) <sup>#2</sup> -Y(1)-O(5)                | 77.35(11)  | O(5)-Y(2)-O(14)                               | 77.85(11)  |
| N(3)-Co(1)-N(2)               | 119.47(18) | O(10)-Y(1)-O(5)                              | 124.68(12) | O(13)-Y(2)-O(14)                              | 53.77(11)  |
| O(3)-Co(1)-N(4)               | 167.67(18) | O(6)-Y(1)-O(5)                               | 52.48(10)  | O(11) <sup>#3</sup> -Y(2)-O(14)               | 120.69(12) |
| N(1)-Co(1)-N(4)               | 77.40(17)  | OW1-Y(1)-O(5)                                | 84.14(11)  | O(12) <sup>#3</sup> -Y(2)-O(14)               | 74.53(11)  |
| <b>Compound 2<sup>b</sup></b> |            |                                              |            |                                               |            |
| Zn-O(3)                       | 1.953(3)   | N(3)-Zn-N(4)                                 | 76.30(13)  | O(9)-Y(1)-O(5)                                | 121.94(7)  |
| Zn-N(1)                       | 2.057(3)   | N(2)-Zn-N(4)                                 | 75.90(13)  | O(2)-Y(2)-O(8) <sup>#2</sup>                  | 76.32(10)  |
| Zn-N(3)                       | 2.062(3)   | O(16) <sup>#1</sup> -Y(1)-O(1)               | 100.92(11) | O(2)-Y(2)-O(15) <sup>#2</sup>                 | 145.51(9)  |
| Zn-N(2)                       | 2.092(3)   | O(16) <sup>#1</sup> -Y(1)-O(7) <sup>#2</sup> | 76.84(9)   | O(8) <sup>#2</sup> -Y(2)-O(15) <sup>#2</sup>  | 74.24(9)   |
| Zn-N(4)                       | 2.291(3)   | O(1)-Y(1)-O(7) <sup>#2</sup>                 | 81.73(10)  | O(2)-Y(2)-O(5)                                | 86.09(9)   |
| Y(1)-O(16) <sup>#1</sup>      | 2.226(2)   | O(16) <sup>#1</sup> -Y(1)-O(10)              | 80.98(9)   | O(8) <sup>#2</sup> -Y(2)-O(5)                 | 87.83(8)   |
| Y(1)-O(1)                     | 2.243(3)   | O(1)-Y(1)-O(10)                              | 74.52(9)   | O(15) <sup>#2</sup> -Y(2)-O(5)                | 75.29(9)   |
| Y(1)-O(7) <sup>#2</sup>       | 2.303(2)   | O(7) <sup>#2</sup> -Y(1)-O(10)               | 143.59(10) | O(2)-Y(2)-O(13)                               | 131.47(9)  |
| Y(1)-O(10)                    | 2.326(3)   | O(16) <sup>#1</sup> -Y(1)-O(6)               | 148.35(10) | O(8) <sup>#2</sup> -Y(2)-O(13)                | 150.91(9)  |
| Y(1)-O(6)                     | 2.387(2)   | O(1)-Y(1)-O(6)                               | 101.90(10) | O(15) <sup>#2</sup> -Y(2)-O(13)               | 81.21(8)   |
| Y(1)-OW1                      | 2.394(3)   | O(7) <sup>#2</sup> -Y(1)-O(6)                | 128.05(9)  | O(5)-Y(2)-O(13)                               | 100.94(8)  |
| Y(1)-O(9)                     | 2.491(2)   | O(10)-Y(1)-O(6)                              | 84.29(9)   | O(2)-Y(2)-O(11) <sup>#3</sup>                 | 107.34(11) |
| Y(1)-O(5)                     | 2.544(2)   | O(16) <sup>#1</sup> -Y(1)-OW1                | 83.74(10)  | O(8) <sup>#2</sup> -Y(2)-O(11) <sup>#3</sup>  | 79.13(9)   |

|                           |            |                                               |           |                                               |           |
|---------------------------|------------|-----------------------------------------------|-----------|-----------------------------------------------|-----------|
| Y(2)-O(2)                 | 2.295(3)   | O(1)-Y(1)-OW1                                 | 159.27(9) | O(15) <sup>#2</sup> -Y(2)-O(11) <sup>#3</sup> | 84.34(10) |
| Y(2)-O(8) <sup>#2</sup>   | 2.295(2)   | O(7) <sup>#2</sup> -Y(1)-OW1                  | 79.69(10) | O(5)-Y(2)-O(11) <sup>#3</sup>                 | 158.21(9) |
| Y(2)-O(15) <sup>#2</sup>  | 2.323(3)   | O(10)-Y(1)-OW1                                | 126.20(9) | O(13)-Y(2)-O(11) <sup>#3</sup>                | 83.21(10) |
| Y(2)-O(5)                 | 2.375(2)   | O(6)-Y(1)-OW1                                 | 82.64(10) | O(2)-Y(2)-O(12) <sup>#3</sup>                 | 74.44(9)  |
| Y(2)-O(13)                | 2.377(2)   | O(16) <sup>#1</sup> -Y(1)-O(9)                | 76.86(9)  | O(8) <sup>#2</sup> -Y(2)-O(12) <sup>#3</sup>  | 111.17(9) |
| Y(2)-O(11) <sup>#3</sup>  | 2.403(3)   | O(1)-Y(1)-O(9)                                | 128.61(9) | O(15) <sup>#2</sup> -Y(2)-O(12) <sup>#3</sup> | 133.52(9) |
| Y(2)-O(12) <sup>#3</sup>  | 2.418(3)   | O(7) <sup>#2</sup> -Y(1)-O(9)                 | 143.08(9) | O(5)-Y(2)-O(12) <sup>#3</sup>                 | 147.97(9) |
| Y(2)-O(14)                | 2.448(2)   | O(10)-Y(1)-O(9)                               | 54.24(9)  | O(13)-Y(2)-O(12) <sup>#3</sup>                | 75.21(9)  |
| O(3)-Zn-N(1)              | 108.36(13) | O(6)-Y(1)-O(9)                                | 71.80(8)  | O(11) <sup>#3</sup> -Y(2)-O(12) <sup>#3</sup> | 53.81(9)  |
| O(3)-Zn-N(3)              | 109.85(14) | OW1-Y(1)-O(9)                                 | 72.10(9)  | O(2)-Y(2)-O(14)                               | 82.01(9)  |
| N(1)-Zn-N(3)              | 116.67(13) | O(16) <sup>#1</sup> -Y(1)-O(5)                | 153.18(9) | O(8) <sup>#2</sup> -Y(2)-O(14)                | 154.72(9) |
| O(3)-Zn-N(2)              | 91.07(13)  | O(1)-Y(1)-O(5)                                | 82.35(9)  | O(15) <sup>#2</sup> -Y(2)-O(14)               | 120.68(9) |
| N(1)-Zn-N(2)              | 108.81(13) | O(7) <sup>#2</sup> -Y(1)-O(5)                 | 77.34(8)  | O(5)-Y(2)-O(14)                               | 77.76(8)  |
| N(3)-Zn-N(2)              | 118.79(14) | O(10)-Y(1)-O(5)                               | 125.01(8) | O(13)-Y(2)-O(14)                              | 53.77(8)  |
| O(3)-Zn-N(4)              | 166.91(13) | O(6)-Y(1)-O(5)                                | 52.55(7)  | O(11) <sup>#3</sup> -Y(2)-O(14)               | 120.30(9) |
| N(1)-Zn-N(4)              | 77.60(13)  | OW1-Y(1)-O(5)                                 | 84.67(8)  | O(12) <sup>#3</sup> -Y(2)-O(14)               | 74.58(9)  |
| <hr/>                     |            |                                               |           |                                               |           |
| Compound 3 <sup>c</sup>   |            |                                               |           |                                               |           |
| <hr/>                     |            |                                               |           |                                               |           |
| Co(1)-O(3)                | 1.955(7)   | N(3)-Co(1)-N(4)                               | 76.0(4)   | O(9)-Er(1)-O(5)                               | 122.1(2)  |
| Co(1)-N(1)                | 2.058(10)  | N(2)-Co(1)-N(4)                               | 76.5(4)   | O(2)-Er(2)-O(8) <sup>#2</sup>                 | 75.9(3)   |
| Co(1)-N(3)                | 2.072(10)  | O(16) <sup>#1</sup> -Er(1)-O(1)               | 101.1(3)  | O(2)-Er(2)-O(15) <sup>#2</sup>                | 146.0(3)  |
| Co(1)-N(2)                | 2.091(10)  | O(16) <sup>#1</sup> -Er(1)-O(7) <sup>#2</sup> | 76.7(3)   | O(8) <sup>#2</sup> -Er(2)-O(15) <sup>#2</sup> | 74.8(3)   |
| Co(1)-N(4)                | 2.235(10)  | O(1)-Er(1)-O(7) <sup>#2</sup>                 | 82.1(3)   | O(2)-Er(2)-O(5)                               | 85.8(3)   |
| Er(1)-O(16) <sup>#1</sup> | 2.212(7)   | O(16) <sup>#1</sup> -Er(1)-O(10)              | 80.8(3)   | O(8) <sup>#2</sup> -Er(2)-O(5)                | 87.6(2)   |
| Er(1)-O(1)                | 2.233(7)   | O(1)-Er(1)-O(10)                              | 73.9(3)   | O(15) <sup>#2</sup> -Er(2)-O(5)               | 76.1(3)   |
| Er(1)-O(7) <sup>#2</sup>  | 2.287(8)   | O(7) <sup>#2</sup> -Er(1)-O(10)               | 143.1(3)  | O(2)-Er(2)-O(13)                              | 131.5(3)  |
| Er(1)-O(10)               | 2.339(8)   | O(16) <sup>#1</sup> -Er(1)-OW1                | 83.7(3)   | O(8) <sup>#2</sup> -Er(2)-O(13)               | 151.4(3)  |
| Er(1)-OW1                 | 2.377(7)   | O(1)-Er(1)-OW1                                | 159.7(3)  | O(15) <sup>#2</sup> -Er(2)-O(13)              | 80.8(2)   |
| Er(1)-O(6)                | 2.381(7)   | O(7) <sup>#2</sup> -Er(1)-OW1                 | 79.8(3)   | O(5)-Er(2)-O(13)                              | 100.9(2)  |
| Er(1)-O(9)                | 2.478(7)   | O(10)-Er(1)-OW1                               | 126.4(3)  | O(2)-Er(2)-O(11) <sup>#3</sup>                | 107.4(3)  |
| Er(1)-O(5)                | 2.536(7)   | O(16) <sup>#1</sup> -Er(1)-O(6)               | 148.0(3)  | O(8) <sup>#2</sup> -Er(2)-O(11) <sup>#3</sup> | 79.6(3)   |

|                               |          |                                               |            |                                                |            |
|-------------------------------|----------|-----------------------------------------------|------------|------------------------------------------------|------------|
| Er(2)-O(2)                    | 2.290(8) | O(1)-Er(1)-O(6)                               | 101.9(3)   | O(15) <sup>#2</sup> -Er(2)-O(11) <sup>#3</sup> | 83.8(3)    |
| Er(2)-O(8) <sup>#2</sup>      | 2.291(7) | O(7) <sup>#2</sup> -Er(1)-O(6)                | 128.4(3)   | O(5)-Er(2)-O(11) <sup>#3</sup>                 | 158.5(3)   |
| Er(2)-O(15) <sup>#2</sup>     | 2.328(8) | O(10)-Er(1)-O(6)                              | 84.5(3)    | O(13)-Er(2)-O(11) <sup>#3</sup>                | 83.2(3)    |
| Er(2)-O(5)                    | 2.369(7) | OW1-Er(1)-O(6)                                | 82.5(3)    | O(2)-Er(2)-O(12) <sup>#3</sup>                 | 74.1(3)    |
| Er(2)-O(13)                   | 2.374(7) | O(16) <sup>#1</sup> -Er(1)-O(9)               | 76.7(3)    | O(8) <sup>#2</sup> -Er(2)-O(12) <sup>#3</sup>  | 111.0(3)   |
| Er(2)-O(11) <sup>#3</sup>     | 2.395(8) | O(1)-Er(1)-O(9)                               | 128.0(3)   | O(15) <sup>#2</sup> -Er(2)-O(12) <sup>#3</sup> | 133.2(3)   |
| Er(2)-O(12) <sup>#3</sup>     | 2.428(8) | O(7) <sup>#2</sup> -Er(1)-O(9)                | 143.1(3)   | O(5)-Er(2)-O(12) <sup>#3</sup>                 | 147.5(3)   |
| Er(2)-O(14)                   | 2.438(7) | O(10)-Er(1)-O(9)                              | 54.3(2)    | O(13)-Er(2)-O(12) <sup>#3</sup>                | 75.7(3)    |
| O(3)-Co(1)-N(1)               | 108.6(4) | OW1-Er(1)-O(9)                                | 72.2(3)    | O(11) <sup>#3</sup> -Er(2)-O(12) <sup>#3</sup> | 53.9(3)    |
| O(3)-Co(1)-N(3)               | 109.0(4) | O(6)-Er(1)-O(9)                               | 71.7(2)    | O(2)-Er(2)-O(14)                               | 81.7(3)    |
| N(1)-Co(1)-N(3)               | 116.7(4) | O(16) <sup>#1</sup> -Er(1)-O(5)               | 153.4(3)   | O(8) <sup>#2</sup> -Er(2)-O(14)                | 153.9(3)   |
| O(3)-Co(1)-N(2)               | 91.9(4)  | O(1)-Er(1)-O(5)                               | 82.2(3)    | O(15) <sup>#2</sup> -Er(2)-O(14)               | 120.9(3)   |
| N(1)-Co(1)-N(2)               | 109.4(4) | O(7) <sup>#2</sup> -Er(1)-O(5)                | 77.7(2)    | O(5)-Er(2)-O(14)                               | 77.4(2)    |
| N(3)-Co(1)-N(2)               | 118.1(4) | O(10)-Er(1)-O(5)                              | 124.8(3)   | O(13)-Er(2)-O(14)                              | 54.1(2)    |
| O(3)-Co(1)-N(4)               | 168.3(4) | OW1-Er(1)-O(5)                                | 84.9(2)    | O(11) <sup>#3</sup> -Er(2)-O(14)               | 120.4(3)   |
| N(1)-Co(1)-N(4)               | 77.2(4)  | O(6)-Er(1)-O(5)                               | 52.7(2)    | O(12) <sup>#3</sup> -Er(2)-O(14)               | 74.6(3)    |
| <b>Compound 4<sup>d</sup></b> |          |                                               |            |                                                |            |
| Zn(1)-O(3)                    | 1.947(3) | N(3)-Zn(1)-N(4)                               | 76.32(15)  | O(9)-Er(1)-O(5)                                | 122.59(9)  |
| Zn(1)-N(1)                    | 2.060(4) | N(2)-Zn(1)-N(4)                               | 75.72(16)  | O(2)-Er(2)-O(8) <sup>#2</sup>                  | 76.43(12)  |
| Zn(1)-N(3)                    | 2.061(4) | O(16) <sup>#1</sup> -Er(1)-O(1)               | 101.49(13) | O(2)-Er(2)-O(15) <sup>#2</sup>                 | 146.48(11) |
| Zn(1)-N(2)                    | 2.099(4) | O(16) <sup>#1</sup> -Er(1)-O(7) <sup>#2</sup> | 76.91(12)  | O(8) <sup>#2</sup> -Er(2)-O(15) <sup>#2</sup>  | 74.96(11)  |
| Zn(1)-N(4)                    | 2.287(4) | O(1)-Er(1)-O(7) <sup>#2</sup>                 | 81.88(13)  | O(2)-Er(2)-O(13)                               | 130.52(11) |
| Er(1)-O(16) <sup>#1</sup>     | 2.211(3) | O(16) <sup>#1</sup> -Er(1)-O(10)              | 81.19(12)  | O(8) <sup>#2</sup> -Er(2)-O(13)                | 151.87(11) |
| Er(1)-O(1)                    | 2.229(3) | O(1)-Er(1)-O(10)                              | 73.73(11)  | O(15) <sup>#2</sup> -Er(2)-O(13)               | 81.10(10)  |
| Er(1)-O(7) <sup>#2</sup>      | 2.292(3) | O(7) <sup>#2</sup> -Er(1)-O(10)               | 143.04(12) | O(2)-Er(2)-O(5)                                | 86.05(11)  |
| Er(1)-O(10)                   | 2.318(3) | O(16) <sup>#1</sup> -Er(1)-O(6)               | 148.09(12) | O(8) <sup>#2</sup> -Er(2)-O(5)                 | 87.54(10)  |
| Er(1)-O(6)                    | 2.368(3) | O(1)-Er(1)-O(6)                               | 101.92(13) | O(15) <sup>#2</sup> -Er(2)-O(5)                | 75.67(10)  |
| Er(1)-OW1                     | 2.376(3) | O(7) <sup>#2</sup> -Er(1)-O(6)                | 127.80(11) | O(13)-Er(2)-O(5)                               | 100.77(10) |
| Er(1)-O(9)                    | 2.482(3) | O(10)-Er(1)-O(6)                              | 84.88(11)  | O(2)-Er(2)-O(11) <sup>#3</sup>                 | 107.80(13) |
| Er(1)-O(5)                    | 2.539(3) | O(16) <sup>#1</sup> -Er(1)-OW1                | 84.34(12)  | O(8) <sup>#2</sup> -Er(2)-O(11) <sup>#3</sup>  | 79.46(12)  |

|                               |            |                                  |            |                                                |            |
|-------------------------------|------------|----------------------------------|------------|------------------------------------------------|------------|
| Er(2)-O(2)                    | 2.282(3)   | O(1)-Er(1)-OW1                   | 159.26(11) | O(15) <sup>#2</sup> -Er(2)-O(11) <sup>#3</sup> | 83.73(12)  |
| Er(2)-O(8) <sup>#2</sup>      | 2.285(3)   | O(7) <sup>#2</sup> -Er(1)-OW1    | 80.10(12)  | O(13)-Er(2)-O(11) <sup>#3</sup>                | 83.49(12)  |
| Er(2)-O(15) <sup>#2</sup>     | 2.314(3)   | O(10)-Er(1)-OW1                  | 127.00(11) | O(5)-Er(2)-O(11) <sup>#3</sup>                 | 157.94(11) |
| Er(2)-O(13)                   | 2.365(3)   | O(6)-Er(1)-OW1                   | 81.40(11)  | O(2)-Er(2)-O(12) <sup>#3</sup>                 | 74.05(12)  |
| Er(2)-O(5)                    | 2.367(3)   | O(16) <sup>#1</sup> -Er(1)-O(9)  | 76.63(12)  | O(8) <sup>#2</sup> -Er(2)-O(12) <sup>#3</sup>  | 111.00(12) |
| Er(2)-O(11) <sup>#3</sup>     | 2.377(3)   | O(1)-Er(1)-O(9)                  | 127.75(11) | O(15) <sup>#2</sup> -Er(2)-O(12) <sup>#3</sup> | 133.15(11) |
| Er(2)-O(12) <sup>#3</sup>     | 2.416(3)   | O(7) <sup>#2</sup> -Er(1)-O(9)   | 143.63(11) | O(13)-Er(2)-O(12) <sup>#3</sup>                | 75.39(12)  |
| Er(2)-O(14)                   | 2.447(3)   | O(10)-Er(1)-O(9)                 | 54.21(10)  | O(5)-Er(2)-O(12) <sup>#3</sup>                 | 148.01(10) |
| O(3)-Zn(1)-N(1)               | 108.68(17) | O(6)-Er(1)-O(9)                  | 71.93(10)  | O(11) <sup>#3</sup> -Er(2)-O(12) <sup>#3</sup> | 54.05(11)  |
| O(3)-Zn(1)-N(3)               | 109.45(16) | OW1-Er(1)-O(9)                   | 72.88(10)  | O(2)-Er(2)-O(14)                               | 80.88(11)  |
| N(1)-Zn(1)-N(3)               | 116.79(16) | O(16) <sup>#1</sup> -Er(1)-O(5)  | 153.22(11) | O(8) <sup>#2</sup> -Er(2)-O(14)                | 153.70(11) |
| O(3)-Zn(1)-N(2)               | 91.16(16)  | O(1)-Er(1)-O(5)                  | 81.69(11)  | O(15) <sup>#2</sup> -Er(2)-O(14)               | 120.98(10) |
| N(1)-Zn(1)-N(2)               | 107.81(16) | O(7) <sup>#2</sup> -Er(1)-O(5)   | 77.26(10)  | O(13)-Er(2)-O(14)                              | 53.85(9)   |
| N(3)-Zn(1)-N(2)               | 119.65(17) | O(10)-Er(1)-O(5)                 | 124.61(10) | O(5)-Er(2)-O(14)                               | 77.71(10)  |
| O(3)-Zn(1)-N(4)               | 166.74(16) | O(6)-Er(1)-O(5)                  | 52.61(9)   | O(11) <sup>#3</sup> -Er(2)-O(14)               | 120.63(11) |
| N(1)-Zn(1)-N(4)               | 77.79(16)  | OW1-Er(1)-O(5)                   | 84.41(10)  | O(12) <sup>#3</sup> -Er(2)-O(14)               | 74.63(11)  |
| <b>Compound 5<sup>e</sup></b> |            |                                  |            |                                                |            |
| Co(1)-O(3)                    | 1.959(13)  | O(1)-Sm(1)-O(10)                 | 71.3(5)    | O(15) <sup>#2</sup> -Sm(2)-O(2')               | 131.9(6)   |
| Co(1)-N(3)                    | 2.046(7)   | O(16) <sup>#1</sup> -Sm(1)-O(10) | 79.7(4)    | O(8) <sup>#2</sup> -Sm(2)-O(5)                 | 94.4(4)    |
| Co(1)-O(4')                   | 2.05(3)    | O(7) <sup>#2</sup> -Sm(1)-O(10)  | 145.4(4)   | O(15) <sup>#2</sup> -Sm(2)-O(5)                | 75.4(4)    |
| Co(1)-N(1)                    | 2.052(6)   | O(1)-Sm(1)-OW1                   | 161.6(5)   | O(2')-Sm(2)-O(5)                               | 62.4(6)    |
| Co(1)-N(2)                    | 2.062(8)   | O(16) <sup>#1</sup> -Sm(1)-OW1   | 86.3(4)    | O(8) <sup>#2</sup> -Sm(2)-O(13)                | 151.6(4)   |
| Co(1)-N(4)                    | 2.217(11)  | O(7) <sup>#2</sup> -Sm(1)-OW1    | 79.2(3)    | O(15) <sup>#2</sup> -Sm(2)-O(13)               | 81.5(3)    |
| Sm(1)-O(1)                    | 2.200(14)  | O(10)-Sm(1)-OW1                  | 126.5(4)   | O(2')-Sm(2)-O(13)                              | 125.2(6)   |
| Sm(1)-O(16) <sup>#1</sup>     | 2.277(10)  | O(1)-Sm(1)-O(6)                  | 106.6(6)   | O(5)-Sm(2)-O(13)                               | 99.1(3)    |
| Sm(1)-O(7) <sup>#2</sup>      | 2.385(10)  | O(16) <sup>#1</sup> -Sm(1)-O(6)  | 148.5(4)   | O(8) <sup>#2</sup> -Sm(2)-O(2)                 | 71.7(6)    |
| Sm(1)-O(10)                   | 2.419(9)   | O(7) <sup>#2</sup> -Sm(1)-O(6)   | 126.2(3)   | O(15) <sup>#2</sup> -Sm(2)-O(2)                | 145.8(6)   |
| Sm(1)-OW1                     | 2.425(8)   | O(10)-Sm(1)-O(6)                 | 83.9(3)    | O(2')-Sm(2)-O(2)                               | 30.1(6)    |
| Sm(1)-O(6)                    | 2.480(9)   | OW1-Sm(1)-O(6)                   | 82.1(3)    | O(5)-Sm(2)-O(2)                                | 91.4(5)    |
| Sm(1)-O(9)                    | 2.514(9)   | O(1)-Sm(1)-O(9)                  | 124.5(4)   | O(13)-Sm(2)-O(2)                               | 132.3(5)   |

|                                |           |                                               |          |                                                  |          |
|--------------------------------|-----------|-----------------------------------------------|----------|--------------------------------------------------|----------|
| Sm(1)-O(5)                     | 2.607(9)  | O(16) <sup>#1</sup> -Sm(1)-O(9)               | 77.1(4)  | O(8) <sup>#2</sup> -Sm(2)-O(12) <sup>#3</sup>    | 103.3(4) |
| Sm(1)-O(2')                    | 2.82(2)   | O(7) <sup>#2</sup> -Sm(1)-O(9)                | 144.8(3) | O(15) <sup>#2</sup> -Sm(2)-O(12) <sup>#3</sup>   | 132.3(4) |
| Sm(1)-O(1')                    | 2.84(3)   | O(10)-Sm(1)-O(9)                              | 53.1(3)  | O(2')-Sm(2)-O(12) <sup>#3</sup>                  | 94.8(6)  |
| Sm(2)-O(8) <sup>#2</sup>       | 2.324(11) | OW1-Sm(1)-O(9)                                | 73.4(3)  | O(5)-Sm(2)-O(12) <sup>#3</sup>                   | 149.4(3) |
| Sm(2)-O(15) <sup>#2</sup>      | 2.355(10) | O(6)-Sm(1)-O(9)                               | 71.6(3)  | O(13)-Sm(2)-O(12) <sup>#3</sup>                  | 76.8(4)  |
| Sm(2)-O(2')                    | 2.36(2)   | O(1)-Sm(1)-O(5)                               | 92.0(5)  | O(2)-Sm(2)-O(12) <sup>#3</sup>                   | 71.2(5)  |
| Sm(2)-O(5)                     | 2.412(9)  | O(16) <sup>#1</sup> -Sm(1)-O(5)               | 154.6(3) | O(8) <sup>#2</sup> -Sm(2)-O(11') <sup>#3</sup>   | 67.3(6)  |
| Sm(2)-O(13)                    | 2.434(10) | O(7) <sup>#2</sup> -Sm(1)-O(5)                | 76.6(3)  | O(15) <sup>#2</sup> -Sm(2)-O(11') <sup>#3</sup>  | 89.7(5)  |
| Sm(2)-O(2)                     | 2.441(17) | O(10)-Sm(1)-O(5)                              | 125.4(4) | O(2')-Sm(2)-O(11') <sup>#3</sup>                 | 122.6(7) |
| Sm(2)-O(12) <sup>#3</sup>      | 2.476(10) | OW1-Sm(1)-O(5)                                | 81.0(3)  | O(5)-Sm(2)-O(11') <sup>#3</sup>                  | 158.7(4) |
| Sm(2)-O(11') <sup>#3</sup>     | 2.50(2)   | O(6)-Sm(1)-O(5)                               | 50.8(3)  | O(13)-Sm(2)-O(11') <sup>#3</sup>                 | 93.5(5)  |
| Sm(2)-O(11) <sup>#3</sup>      | 2.518(17) | O(9)-Sm(1)-O(5)                               | 119.4(3) | O(2)-Sm(2)-O(11') <sup>#3</sup>                  | 92.7(7)  |
| Sm(2)-O(14)                    | 2.558(9)  | O(1)-Sm(1)-O(2')                              | 38.0(6)  | O(12) <sup>#3</sup> -Sm(2)-O(11') <sup>#3</sup>  | 50.6(5)  |
| O(3)-Co(1)-N(3)                | 110.6(5)  | O(16) <sup>#1</sup> -Sm(1)-O(2')              | 127.0(6) | O(8) <sup>#2</sup> -Sm(2)-O(11') <sup>#3</sup>   | 83.8(5)  |
| O(3)-Co(1)-O(4')               | 35.3(9)   | O(7) <sup>#2</sup> -Sm(1)-O(2')               | 75.3(5)  | O(15) <sup>#2</sup> -Sm(2)-O(11') <sup>#3</sup>  | 79.2(5)  |
| N(3)-Co(1)-O(4')               | 95.2(8)   | O(10)-Sm(1)-O(2')                             | 95.8(5)  | O(2')-Sm(2)-O(11') <sup>#3</sup>                 | 142.0(7) |
| O(3)-Co(1)-N(1)                | 110.2(5)  | OW1-Sm(1)-O(2')                               | 132.0(5) | O(5)-Sm(2)-O(11') <sup>#3</sup>                  | 154.3(5) |
| N(3)-Co(1)-N(1)                | 116.8(3)  | O(6)-Sm(1)-O(2')                              | 81.2(5)  | O(13)-Sm(2)-O(11') <sup>#3</sup>                 | 73.3(5)  |
| O(4')-Co(1)-N(1)               | 91.6(8)   | O(9)-Sm(1)-O(2')                              | 139.8(5) | O(2)-Sm(2)-O(11') <sup>#3</sup>                  | 112.0(7) |
| O(3)-Co(1)-N(2)                | 87.8(5)   | O(5)-Sm(1)-O(2')                              | 54.0(5)  | O(12) <sup>#3</sup> -Sm(2)-O(11') <sup>#3</sup>  | 54.2(5)  |
| N(3)-Co(1)-N(2)                | 118.1(4)  | O(1)-Sm(1)-O(1')                              | 13.4(8)  | O(11') <sup>#3</sup> -Sm(2)-O(11') <sup>#3</sup> | 21.7(5)  |
| O(4')-Co(1)-N(2)               | 122.8(9)  | O(16) <sup>#1</sup> -Sm(1)-O(1')              | 82.7(7)  | O(8) <sup>#2</sup> -Sm(2)-O(14)                  | 154.8(4) |
| N(1)-Co(1)-N(2)                | 109.4(3)  | O(7) <sup>#2</sup> -Sm(1)-O(1')               | 72.6(6)  | O(15) <sup>#2</sup> -Sm(2)-O(14)                 | 121.8(3) |
| O(3)-Co(1)-N(4)                | 164.5(6)  | O(10)-Sm(1)-O(1')                             | 77.5(6)  | O(2')-Sm(2)-O(14)                                | 71.9(6)  |
| N(3)-Co(1)-N(4)                | 76.4(4)   | OW1-Sm(1)-O(1')                               | 151.2(6) | O(5)-Sm(2)-O(14)                                 | 77.7(3)  |
| O(4')-Co(1)-N(4)               | 160.1(9)  | O(6)-Sm(1)-O(1')                              | 119.7(6) | O(13)-Sm(2)-O(14)                                | 53.4(3)  |
| N(1)-Co(1)-N(4)                | 76.8(4)   | O(9)-Sm(1)-O(1')                              | 129.0(6) | O(2)-Sm(2)-O(14)                                 | 84.5(6)  |
| N(2)-Co(1)-N(4)                | 76.7(4)   | O(5)-Sm(1)-O(1')                              | 98.1(6)  | O(12) <sup>#3</sup> -Sm(2)-O(14)                 | 75.8(3)  |
| O(1)-Sm(1)-O(16) <sup>#1</sup> | 93.4(6)   | O(2')-Sm(1)-O(1')                             | 45.4(7)  | O(11') <sup>#3</sup> -Sm(2)-O(14)                | 123.5(5) |
| O(1)-Sm(1)-O(7) <sup>#2</sup>  | 82.6(5)   | O(8) <sup>#2</sup> -Sm(2)-O(15) <sup>#2</sup> | 77.9(4)  | O(11) <sup>#3</sup> -Sm(2)-O(14)                 | 113.6(4) |

|                                               |           |                                 |           |                                               |           |
|-----------------------------------------------|-----------|---------------------------------|-----------|-----------------------------------------------|-----------|
| O(16) <sup>#1</sup> -Sm(1)-O(7) <sup>#2</sup> | 79.5(4)   | O(8) <sup>#2</sup> -Sm(2)-O(2') | 83.2(6)   |                                               |           |
| <b>Compound 6<sup>f</sup></b>                 |           |                                 |           |                                               |           |
| Ni(1)-O(1)                                    | 2.00(4)   | N(10)-Ni(2)-O(20)               | 97.6(16)  | O(13)-Y(1)-O(5)                               | 136.1(12) |
| Ni(1)-N(1)                                    | 2.01(4)   | N(10)-Ni(2)-N(12)               | 93.2(17)  | O(15) <sup>#1</sup> -Y(2)-O(16)               | 105.7(13) |
| Ni(1)-N(3)                                    | 2.02(4)   | O(20)-Ni(2)-N(12)               | 101.7(17) | O(15) <sup>#1</sup> -Y(2)-O(18)               | 154.7(13) |
| Ni(1)-N(5)                                    | 2.02(4)   | N(10)-Ni(2)-N(8)                | 98.3(17)  | O(16)-Y(2)-O(18)                              | 77.2(13)  |
| Ni(1)-N(7)                                    | 2.27(4)   | O(20)-Ni(2)-N(8)                | 101.0(17) | O(15) <sup>#1</sup> -Y(2)-O(8) <sup>#2</sup>  | 102.3(14) |
| Ni(2)-N(10)                                   | 2.00(4)   | N(12)-Ni(2)-N(8)                | 152.8(18) | O(16)-Y(2)-O(8) <sup>#2</sup>                 | 151.1(14) |
| Ni(2)-O(20)                                   | 2.01(4)   | N(10)-Ni(2)-N(14)               | 80.8(16)  | O(18)-Y(2)-O(8) <sup>#2</sup>                 | 80.6(14)  |
| Ni(2)-N(12)                                   | 2.03(4)   | O(20)-Ni(2)-N(14)               | 177.6(16) | O(15) <sup>#1</sup> -Y(2)-OW10                | 77.2(14)  |
| Ni(2)-N(8)                                    | 2.05(4)   | N(12)-Ni(2)-N(14)               | 80.2(17)  | O(16)-Y(2)-OW10                               | 68.0(15)  |
| Ni(2)-N(14)                                   | 2.25(4)   | N(8)-Ni(2)-N(14)                | 77.5(16)  | O(18)-Y(2)-OW10                               | 125.5(14) |
| Y(1)-O(3)                                     | 2.23(4)   | O(3)-Y(1)-O(9)                  | 158.8(12) | O(8) <sup>#2</sup> -Y(2)-OW10                 | 112.4(15) |
| Y(1)-O(9)                                     | 2.26(3)   | O(3)-Y(1)-OW9                   | 98.6(14)  | O(15) <sup>#1</sup> -Y(2)-O(17)               | 151.0(13) |
| Y(1)-OW9                                      | 2.32(4)   | O(9)-Y(1)-OW9                   | 85.8(14)  | O(16)-Y(2)-O(17)                              | 79.6(13)  |
| Y(1)-OW8                                      | 2.34(3)   | O(3)-Y(1)-OW8                   | 89.5(13)  | O(18)-Y(2)-O(17)                              | 54.1(12)  |
| Y(1)-O(6)                                     | 2.38(3)   | O(9)-Y(1)-OW8                   | 95.0(12)  | O(8) <sup>#2</sup> -Y(2)-O(17)                | 72.5(14)  |
| Y(1)-O(14)                                    | 2.43(3)   | OW9-Y(1)-OW8                    | 155.5(12) | OW10-Y(2)-O(17)                               | 78.7(14)  |
| Y(1)-O(13)                                    | 2.43(3)   | O(3)-Y(1)-O(6)                  | 75.8(13)  | O(15) <sup>#1</sup> -Y(2)-O(11) <sup>#1</sup> | 81.6(12)  |
| Y(1)-O(5)                                     | 2.54(3)   | O(9)-Y(1)-O(6)                  | 125.3(12) | O(16)-Y(2)-O(11) <sup>#1</sup>                | 121.0(14) |
| Y(2)-O(15) <sup>#1</sup>                      | 2.25(3)   | OW9-Y(1)-O(6)                   | 77.6(13)  | O(18)-Y(2)-O(11) <sup>#1</sup>                | 75.8(12)  |
| Y(2)-O(16)                                    | 2.35(4)   | OW8-Y(1)-O(6)                   | 82.1(13)  | O(8) <sup>#2</sup> -Y(2)-O(11) <sup>#1</sup>  | 69.9(13)  |
| Y(2)-O(18)                                    | 2.39(3)   | O(3)-Y(1)-O(14)                 | 78.1(13)  | OW10-Y(2)-O(11) <sup>#1</sup>                 | 158.6(14) |
| Y(2)-O(8) <sup>#2</sup>                       | 2.42(4)   | O(9)-Y(1)-O(14)                 | 83.0(12)  | O(17)-Y(2)-O(11) <sup>#1</sup>                | 120.8(12) |
| Y(2)-OW10                                     | 2.44(5)   | OW9-Y(1)-O(14)                  | 76.1(12)  | O(15) <sup>#1</sup> -Y(2)-O(12) <sup>#1</sup> | 74.9(13)  |
| Y(2)-O(17)                                    | 2.45(3)   | OW8-Y(1)-O(14)                  | 128.3(12) | O(16)-Y(2)-O(12) <sup>#1</sup>                | 72.6(13)  |
| Y(2)-O(11) <sup>#1</sup>                      | 2.47(3)   | O(6)-Y(1)-O(14)                 | 139.3(13) | O(18)-Y(2)-O(12) <sup>#1</sup>                | 82.3(12)  |
| Y(2)-O(12) <sup>#1</sup>                      | 2.47(4)   | O(3)-Y(1)-O(13)                 | 83.2(13)  | O(8) <sup>#2</sup> -Y(2)-O(12) <sup>#1</sup>  | 122.4(13) |
| Y(2)-O(7) <sup>#2</sup>                       | 2.56(4)   | O(9)-Y(1)-O(13)                 | 78.0(12)  | OW10-Y(2)-O(12) <sup>#1</sup>                 | 122.2(14) |
| O(1)-Ni(1)-N(1)                               | 100.0(16) | OW9-Y(1)-O(13)                  | 128.5(12) | O(17)-Y(2)-O(12) <sup>#1</sup>                | 132.6(12) |

|                 |           |                  |           |                                               |           |
|-----------------|-----------|------------------|-----------|-----------------------------------------------|-----------|
| O(1)-Ni(1)-N(3) | 100.5(16) | OW8-Y(1)-O(13)   | 75.2(11)  | O(11) <sup>#1</sup> -Y(2)-O(12) <sup>#1</sup> | 52.6(12)  |
| N(1)-Ni(1)-N(3) | 93.4(17)  | O(6)-Y(1)-O(13)  | 149.1(12) | O(15) <sup>#1</sup> -Y(2)-O(7) <sup>#2</sup>  | 79.7(12)  |
| O(1)-Ni(1)-N(5) | 101.9(17) | O(14)-Y(1)-O(13) | 53.7(11)  | O(16)-Y(2)-O(7) <sup>#2</sup>                 | 127.6(15) |
| N(1)-Ni(1)-N(5) | 154.9(18) | O(3)-Y(1)-O(5)   | 127.3(12) | O(18)-Y(2)-O(7) <sup>#2</sup>                 | 119.1(13) |
| N(3)-Ni(1)-N(5) | 94.7(17)  | O(9)-Y(1)-O(5)   | 73.7(11)  | O(8) <sup>#2</sup> -Y(2)-O(7) <sup>#2</sup>   | 51.4(14)  |
| O(1)-Ni(1)-N(7) | 178.4(15) | OW9-Y(1)-O(5)    | 82.3(12)  | OW10-Y(2)-O(7) <sup>#2</sup>                  | 62.6(15)  |
| N(1)-Ni(1)-N(7) | 79.1(16)  | OW8-Y(1)-O(5)    | 74.5(11)  | O(17)-Y(2)-O(7) <sup>#2</sup>                 | 75.0(14)  |
| N(3)-Ni(1)-N(7) | 80.9(16)  | O(6)-Y(1)-O(5)   | 52.7(12)  | O(11) <sup>#1</sup> -Y(2)-O(7) <sup>#2</sup>  | 111.4(14) |
| N(5)-Ni(1)-N(7) | 78.7(16)  | O(14)-Y(1)-O(5)  | 149.3(12) | O(12) <sup>#1</sup> -Y(2)-O(7) <sup>#2</sup>  | 151.5(14) |

<sup>a</sup>Symmetry code: <sup>#1</sup>  $x, y - 1, z$ ; <sup>#2</sup>  $-x + 3, y - 1/2, -z + 1/2$ ; <sup>#3</sup>  $x, -y + 3/2, z - 1/2$ . <sup>b</sup>Symmetry code: <sup>#1</sup>  $x, y - 1, z$ ; <sup>#2</sup>  $-x + 3, y - 1/2, -z + 1/2$ ; <sup>#3</sup>  $x, -y + 3/2, z - 1/2$ . <sup>c</sup>Symmetry code: <sup>#1</sup>  $x, y - 1, z$ ; <sup>#2</sup>  $-x + 3, y - 1/2, -z + 1/2$ ; <sup>#3</sup>  $x, -y + 3/2, z - 1/2$ . <sup>d</sup>Symmetry code: <sup>#1</sup>  $x, y - 1, z$ ; <sup>#2</sup>  $-x + 3, y - 1/2, -z + 1/2$ ; <sup>#3</sup>  $x, -y + 3/2, z - 1/2$ . <sup>e</sup>Symmetry code: <sup>#1</sup>  $x, y - 1, z$ ; <sup>#2</sup>  $-x + 3, y - 1/2, -z + 1/2$ ; <sup>#3</sup>  $x, -y + 3/2, z - 1/2$ . <sup>f</sup>Symmetry code: <sup>#1</sup>  $-x + 1, -y, -z + 1$ ; <sup>#2</sup>  $x, y, z + 1$ .

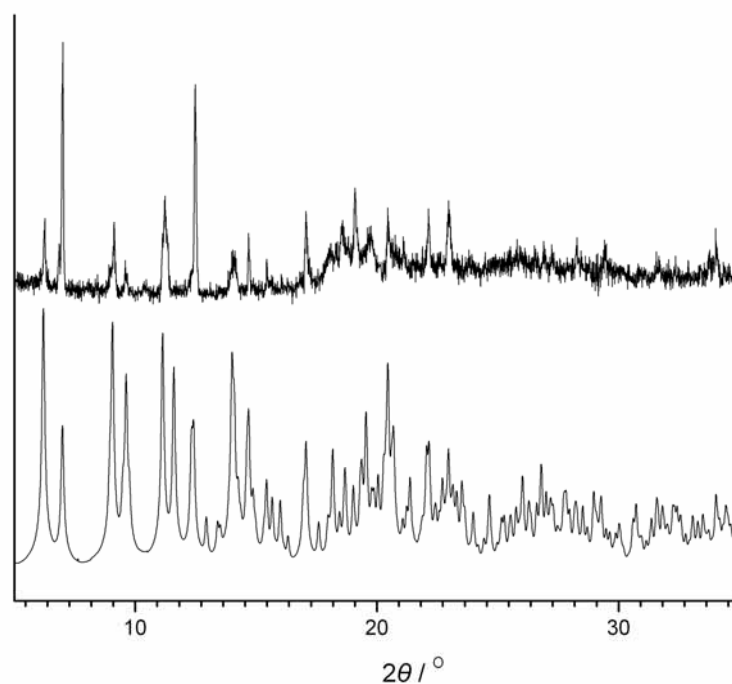

**Fig. S1** Experimental (top) and simulated (bottom) XRD patterns for compound **1**.



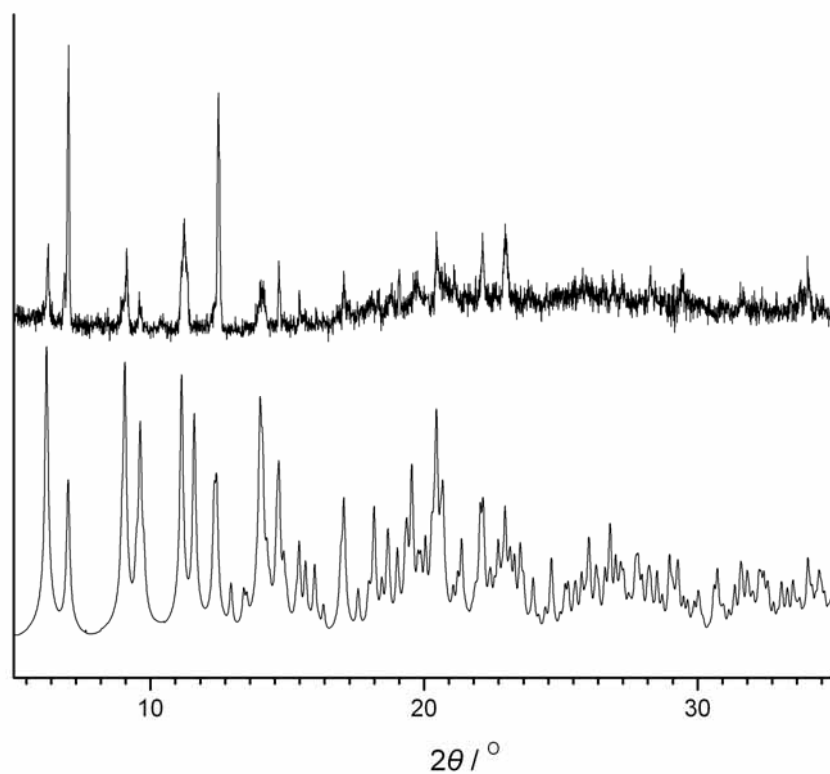

**Fig. S2** Experimental (top) and simulated (bottom) XRD patterns for compound **2**.

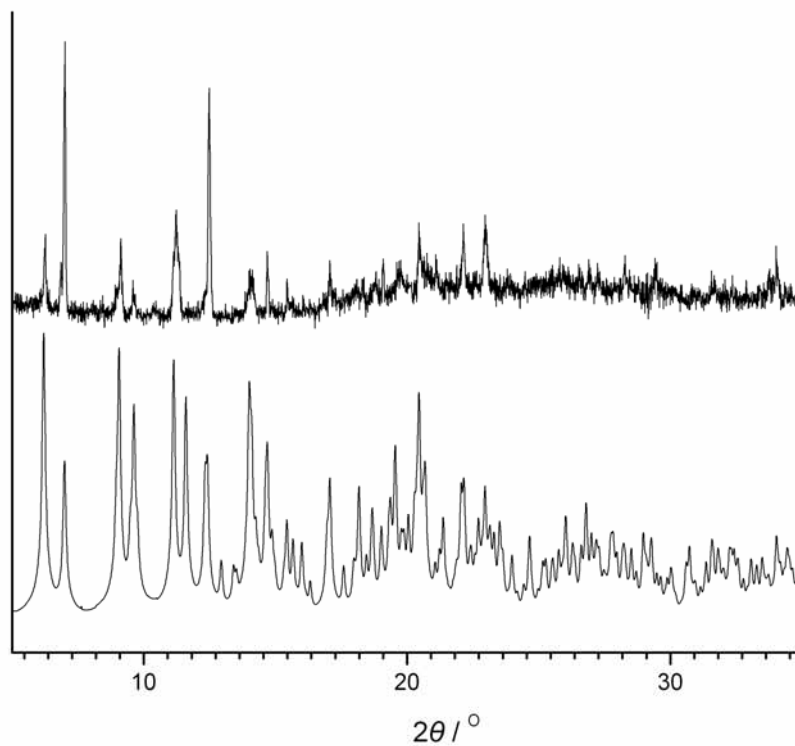

**Fig. S3** Experimental (top) and simulated (bottom) XRD patterns for compound **3**.

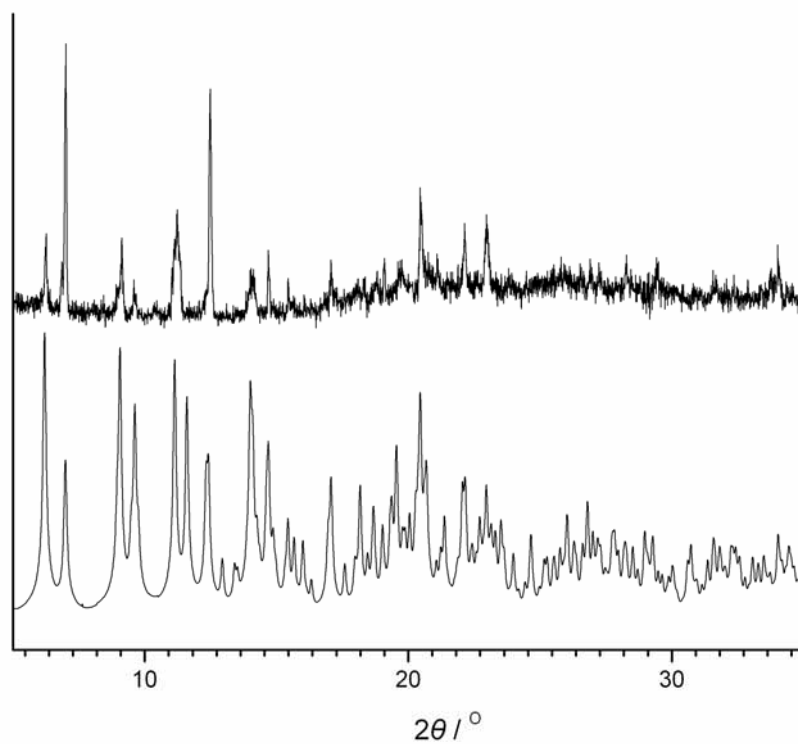

**Fig. S4** Experimental (top) and simulated (bottom) XRD patterns for compound **4**.

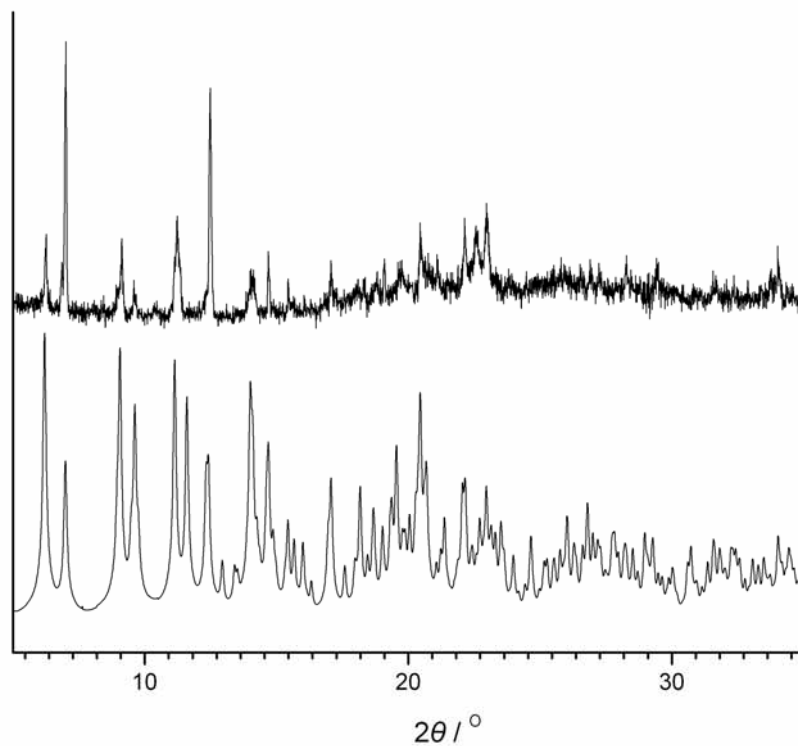

**Fig. S5** Experimental (top) and simulated (bottom) XRD patterns for compound **5**.

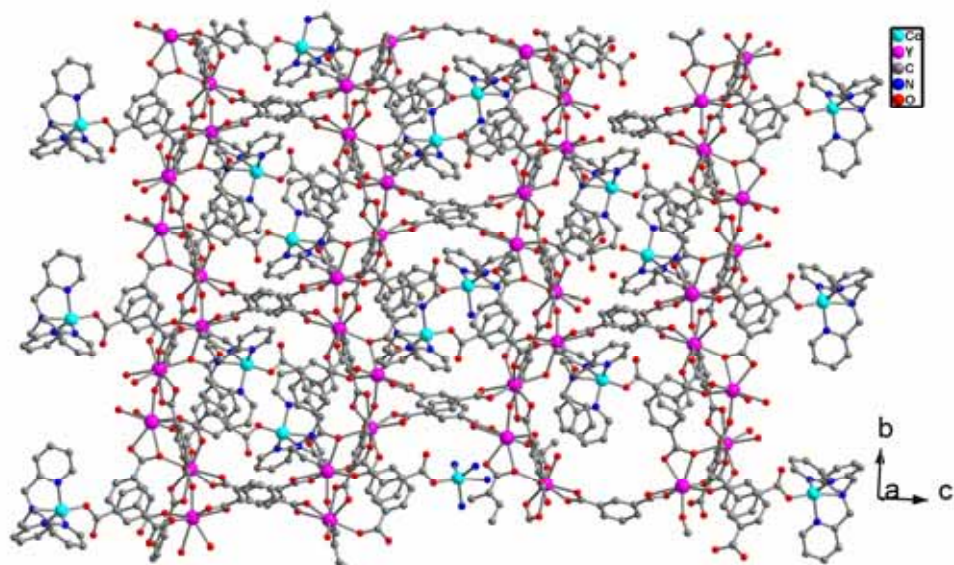

**Fig. S6** The 2D structure of **1** viewed in the *bc* plane.

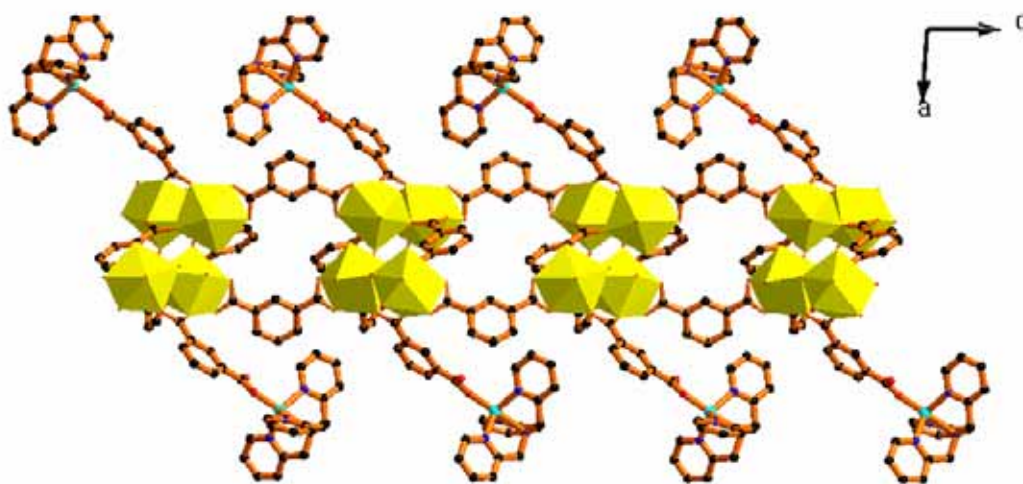

**Fig. S7** The 1D structure of **1** viewed along the *c* axis.

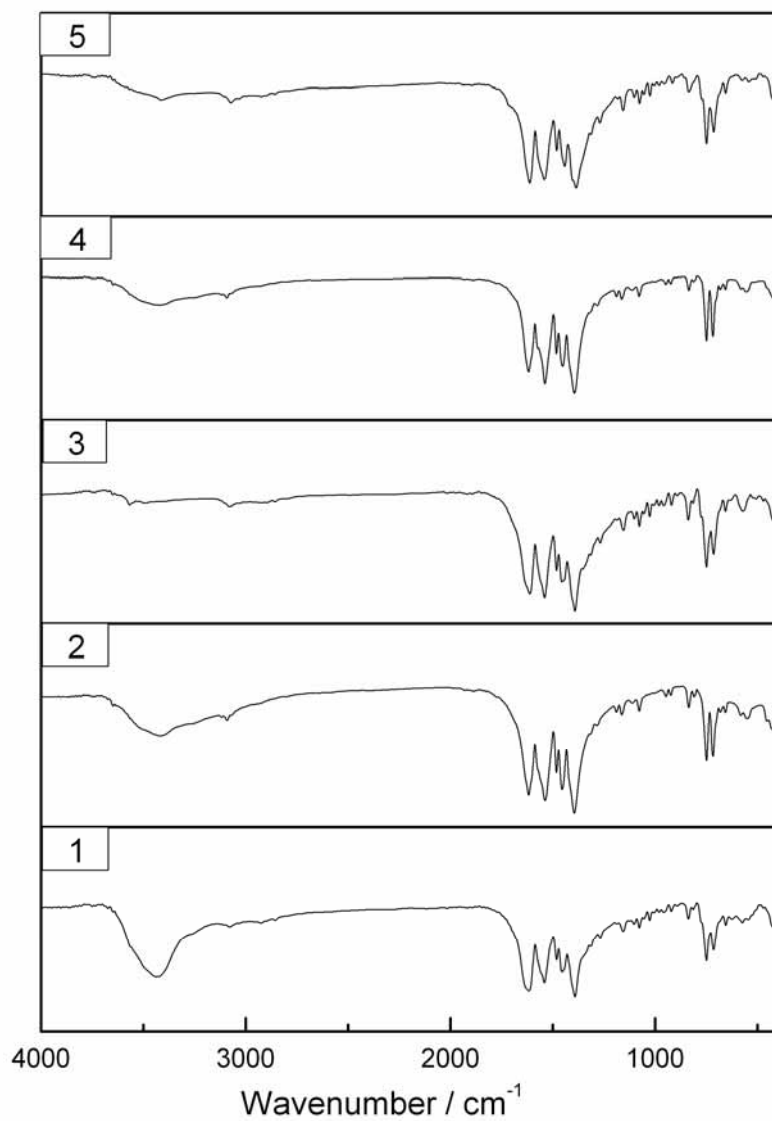

**Fig. S8** The IR spectra of **1**.

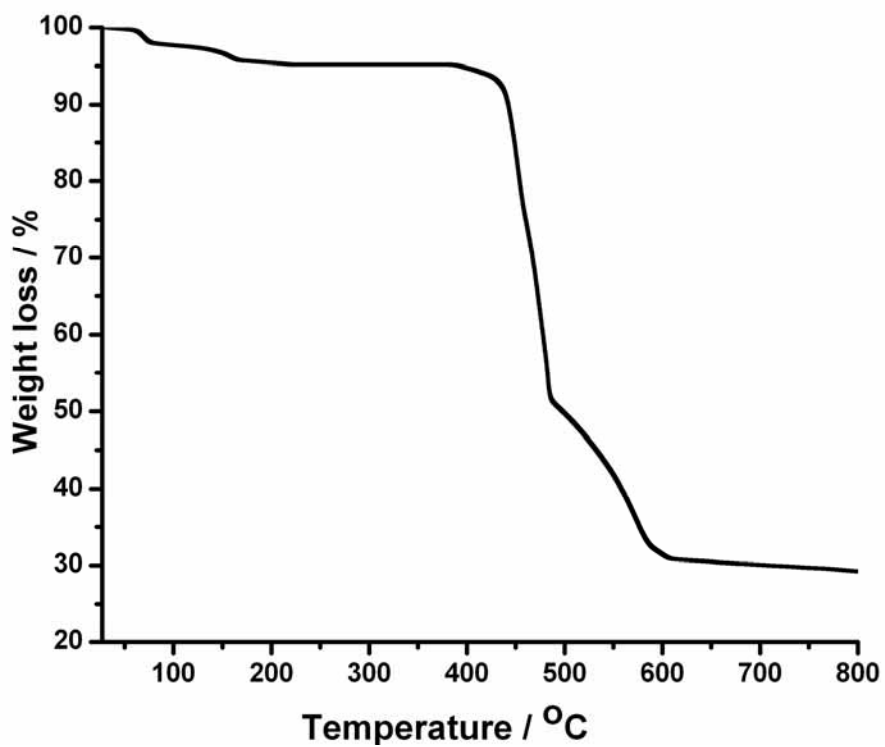

Fig. S9 TGA curve of 1.

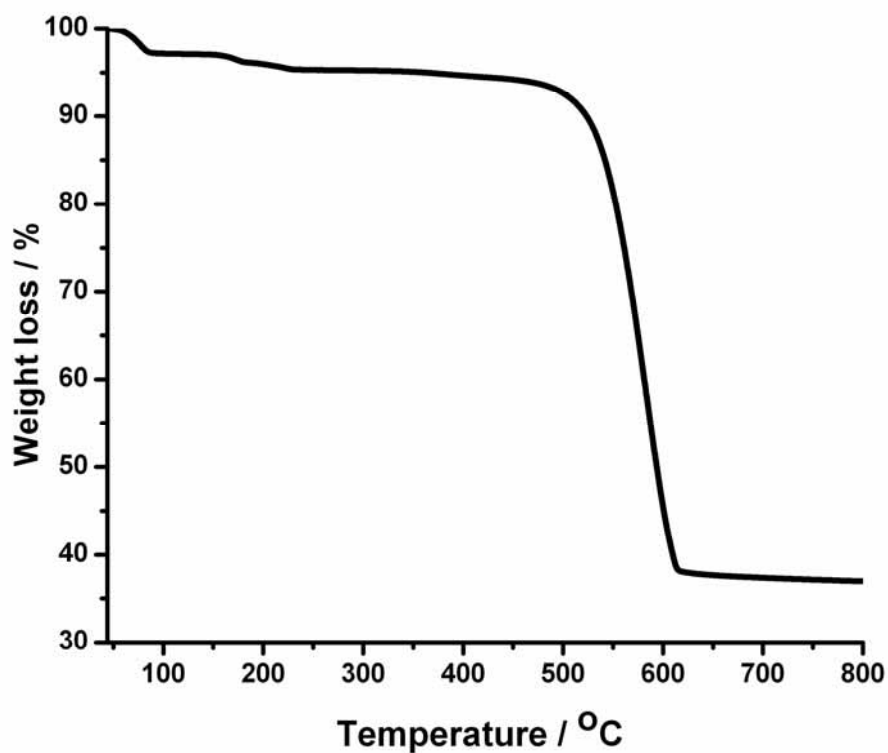

Fig. S10 TGA curve of 2.

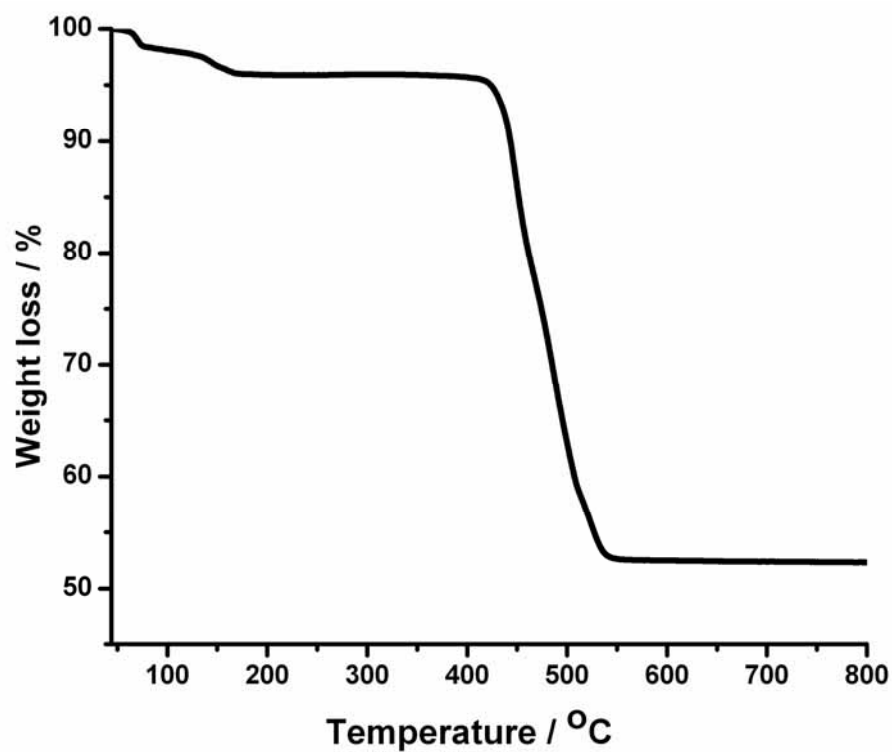

Fig. S11 TGA curve of 3.

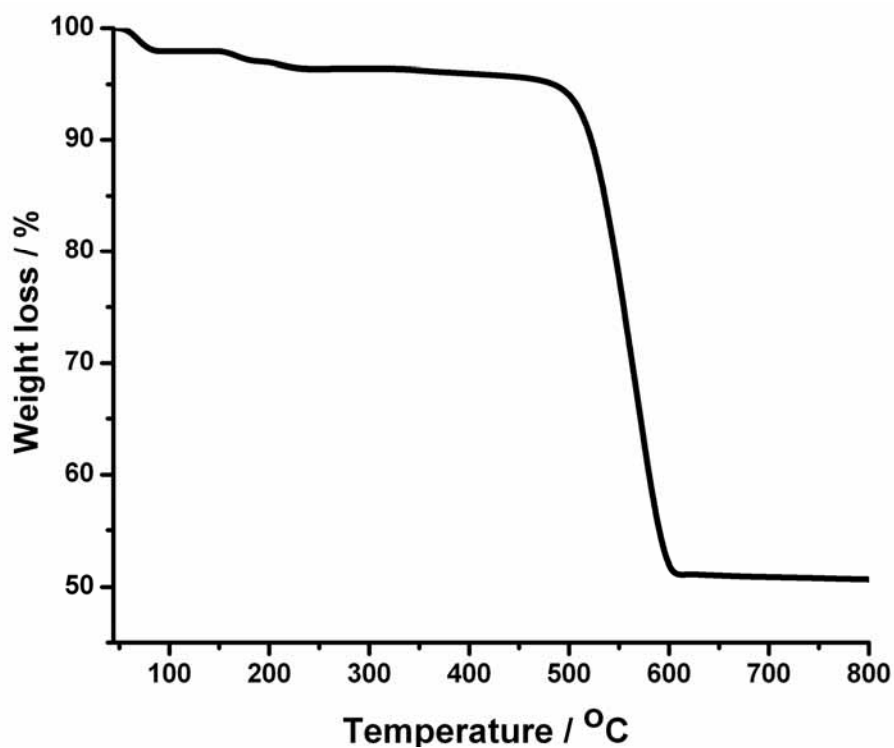

Fig. S12 TGA curve of 4.

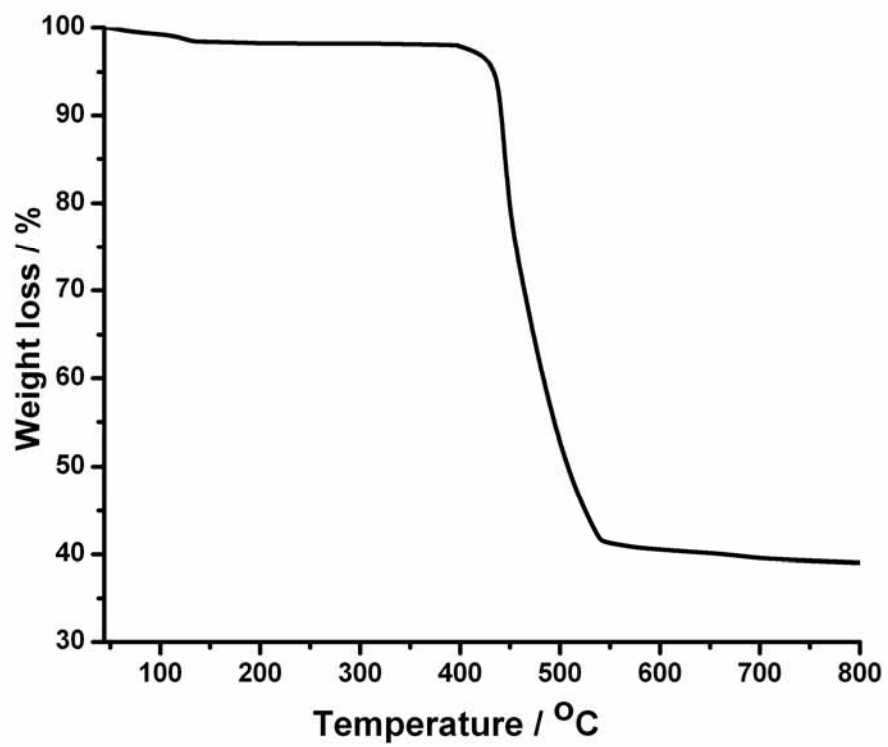

**Fig. S13** TGA curve of **5**.
